# Supplementary material for: Geometric cues stabilise long-axis polarisation of PAR protein patterns in C. elegans
Source: PubMed Central journal article supplement (PMC6985163; doi:10.1038/s41467-020-14317-w), 2020-01-27
Supplement: 41467_2020_14317_MOESM1_ESM.pdf [file 41467_2020_14317_MOESM1_ESM.pdf]

## Supplementary Movies:

All Supplementary Movies were produced from image sequences from FEM (COMSOL) simulations. The image sequences were wrapped using the free program ffmpeg (<https://www.ffmpeg.org/>).

Supplementary Movie 1 (M2d\_1.mp4) shows a simulation of our 2d model, specifically the time evolution of membrane concentrations ( $A_1 + A_{12}$  in red and  $P$  in blue) for the cytosolic reactivation and diffusion  $\lambda = 0.05s^{-1}$  and  $D_{cyt} = 30\mu m^2s^{-1}$ . All other parameters were set according to Table 1 in the main manuscript.

Membrane concentrations in the 2d ellipse are given in numbers of 5 particles per unit length (i.e. a line density).

Supplementary Movie 2 (M2d\_2.mp4) shows a simulation of our 2d model, specifically the time evolution of membrane concentrations ( $A_1 + A_{12}$  in red and  $P$  in blue) for the cytosolic reactivation and diffusion  $\lambda = 0.3s^{-1}$  and  $D_{cyt} = 30\mu m^2s^{-1}$ . All other parameters were set according to Table 1 in the main manuscript.

Membrane concentrations in the 2d ellipse are given in numbers of 5 particles per unit length (i.e. a line density).

Supplementary Movie 3 (M2d\_3.mp4) shows a simulation of our 2d model, specifically the time evolution of membrane concentrations ( $A_1 + A_{12}$  in red and  $P$  in blue) for the cytosolic reactivation and diffusion  $\lambda = 0.3s^{-1}$  and  $D_{cyt} = 30\mu m^2s^{-1}$ . All other parameters were set according to Table 1 in the main manuscript.

Membrane concentrations in the 2d ellipse are given in numbers of 5 particles per unit length (i.e. a line density).

Supplementary Movies 4 to 8 (M3d\_1.mp4 to M3d\_5.mp4) show simulations of the 3d model, specifically, the time evolution of the membrane concentration of  $A_1 + A_{12}$  (rainbow colour code) starting with an aPAR dominant membrane state. Different movies show different geometries and different cytosolic parameters.

Parameters were set according to Table 4 in the main text for the prolate geometry and according to Supplementary Table 4 for the oblate geometry.

Supplementary Movie 4 shows, in prolate geometry, the establishment of steady state long-axis polarisation from onset on. The cytosolic reactivation and diffusion are set to  $\lambda = 0.05s^{-1}$  and  $D_{cyt} = 50\mu m^2s^{-1}$ , all other parameters are given in Table 4 of the main text.

Supplementary Movie 5 shows, in prolate geometry, the establishment of short-axis polarisation at onset which then rotates to a steady state long-axis polarisation. The cytosolic reactivation and diffusion are set to  $\lambda = 0.3s^{-1}$  and  $D_{cyt} = 10\mu m^2s^{-1}$ , all other parameters are given in Table 4 of the main text.

Supplementary Movie 6 shows, in oblate geometry, the establishment of short-axis polarisation at onset which then rotates to a steady state long-axis polarisation. The cytosolic reactivation and diffusion are set to  $\lambda = 0.3s^{-1}$  and  $D_{cyt} = 18\mu m^2s^{-1}$ , all other parameters are given in Supplementary Table 4 of the main text.

Supplementary Movie 7 shows, in oblate geometry, the establishment of steady state long-axis polarisation from onset on. The cytosolic reactivation and diffusion are set to  $\lambda =$

$0.03s^{-1}$  and  $D_{\text{cyt}} = 50\mu\text{m}^2s^{-1}$ , all other parameters are given in Supplementary Table 4 of the main text.

Supplementary Movie 8 shows, in oblate geometry, the establishment of steady state short-axis polarisation from onset on. The cytosolic reactivation and diffusion are set to  $\lambda = 0.2s^{-1}$  and  $D_{\text{cyt}} = 3\mu\text{m}^2s^{-1}$ , all other parameters are given in Supplementary Table 4 of the main text.
